# Supplementary material for: Effective defect passivation with a designer ionic molecule for high-efficiency vapour-deposited inorganic phase-pure CsPbBr3 perovskite solar cells
Source: Royal Society of Chemistry journal article supplement (doi:10.1039/d2ta06092b), 2022-12-09
Supplement: d2ta06092b1.pdf [file d2ta06092b1.pdf]

## Supporting Information

# Effective defect passivation with a designer ionic molecule for high-efficiency vapour-deposited inorganic phase-pure CsPbBr<sub>3</sub> perovskite solar cells

Ruxin Guo,<sup>‡ad</sup> Junmin Xia,<sup>‡b</sup> Hao Gu,<sup>‡b</sup> Yan Zhao,<sup>a</sup> Xuke Chu,<sup>a</sup> Xianghuan Meng,<sup>a</sup> Zhiheng Wu,<sup>ad</sup> Jiangning Li,<sup>a</sup> Yanyan Duan,<sup>a</sup> Zhenzhen Li,<sup>a</sup> Zhaorui Wen,<sup>b</sup> Shi Chen,<sup>b</sup> Yongqing Cai,<sup>b</sup> Chao Liang,<sup>\*c</sup> Yonglong Shen,<sup>\*ad</sup> Guichuan Xing,<sup>\*b</sup> Wei Zhang<sup>e</sup> and Guosheng Shao<sup>\*ad</sup>

<sup>a</sup>State Centre for International Cooperation on Designer Low-carbon & Environmental Materials (CDLCEM), School of Materials Science and Engineering, Zhengzhou University, Zhengzhou 450001, P. R. China.

<sup>b</sup>Joint Key Laboratory of the Ministry of Education Institute of Applied Physics and Materials Engineering University of Macau Avenida da Universidade Taipa, Macau 999078, P. R. China.

<sup>c</sup>MOE Key Laboratory for Nonequilibrium Synthesis and Modulation of Condensed Matter, School of Physics, Xi'an Jiaotong University, Xi'an 710049, P. R. China.

<sup>d</sup>Zhengzhou Materials Genome Institute (ZMGI), Building 2, Zhongyuanzhigu, Xingyang, Zhengzhou 450100, P. R. China.

<sup>e</sup>Advanced Technology Institute (ATI), University of Surrey, Guildford, Surrey, GU27XH, UK.

<sup>‡</sup>These authors contributed equally.

Email: [chaoliang@um.edu.mo](mailto:chaoliang@um.edu.mo), [shenyonglong@zzu.edu.cn](mailto:shenyonglong@zzu.edu.cn), [gcxing@um.edu.mo](mailto:gcxing@um.edu.mo); [gsshao@zzu.edu.cn](mailto:gsshao@zzu.edu.cn)

## Supplementary Figures

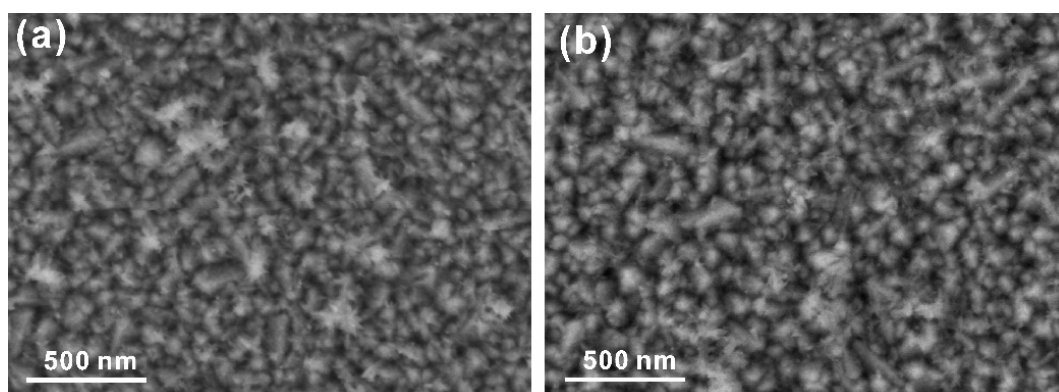

**Fig. S1** The top-view of (a)  $\text{TiO}_2$  and (b)  $\text{TiO}_2/\text{DTPT}$  films deposited on glass/FTO.

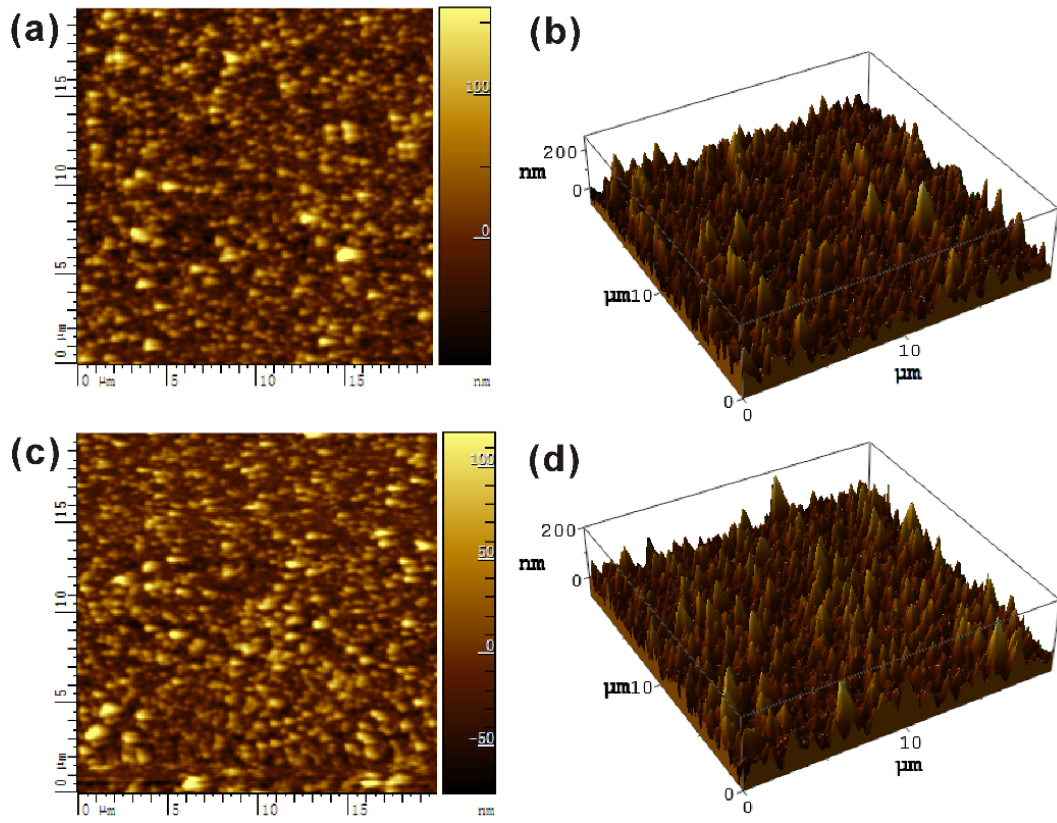

**Fig. S2** AFM pictures of (a)  $\text{TiO}_2$  and (c)  $\text{TiO}_2/\text{DTPT}$  films, corresponding 3D diagram.

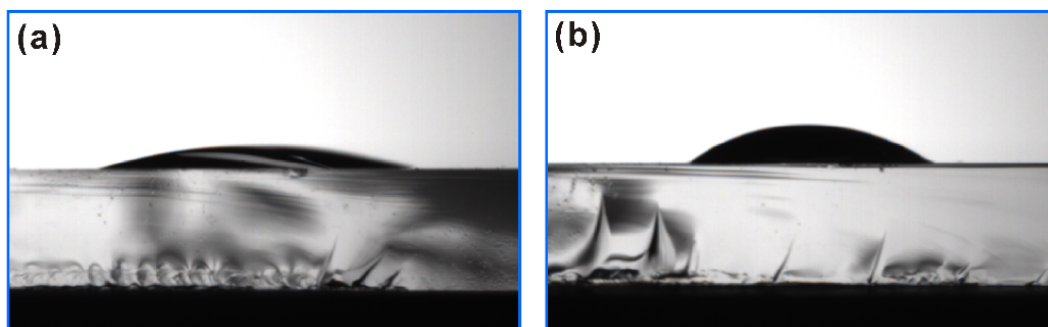

**Fig. S3** The images show contact angle measurement of water and on (a)  $\text{TiO}_2$  and (b)  $\text{TiO}_2/\text{DTPT}$  films.

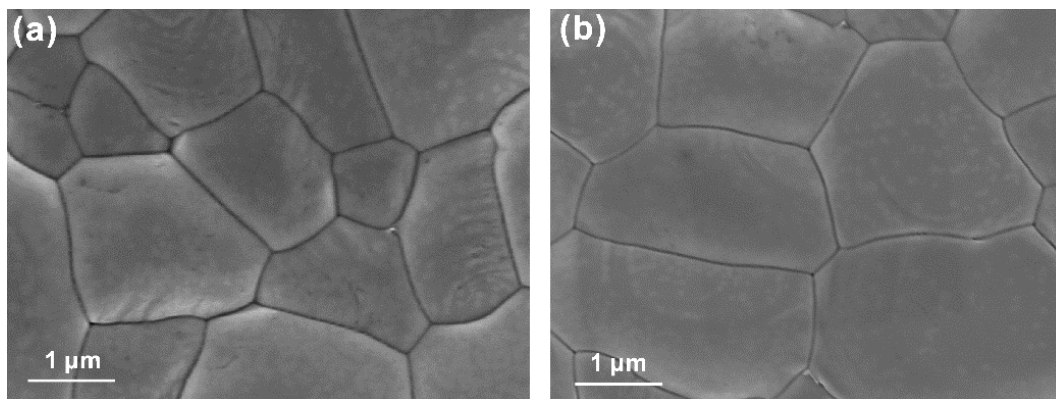

**Fig. S4** Top view SEM images of CsPbBr<sub>3</sub> films based on (a) TiO<sub>2</sub> and (b) TiO<sub>2</sub>/DTPT films.

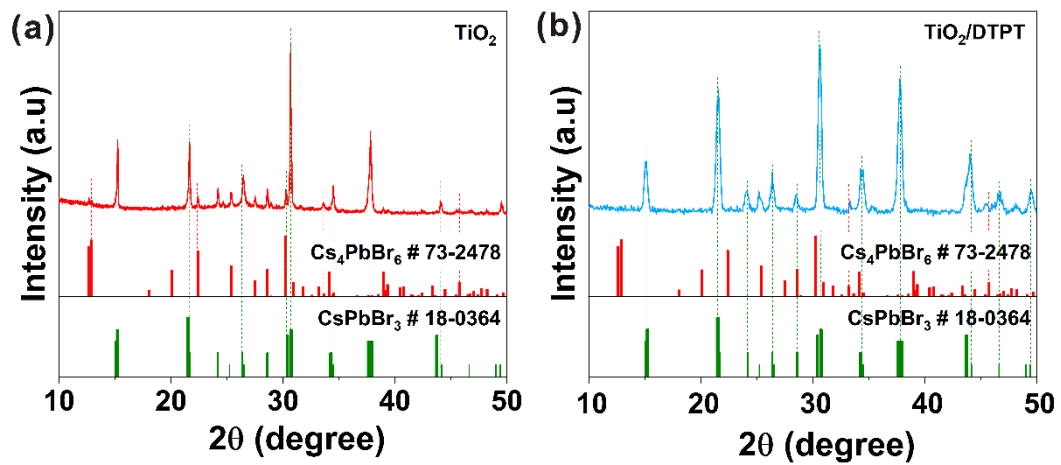

Fig. S5 XRD patterns of  $\text{CsPbBr}_3$  films based on (a)  $\text{TiO}_2$  and (b)  $\text{TiO}_2/\text{DTPT}$  films.

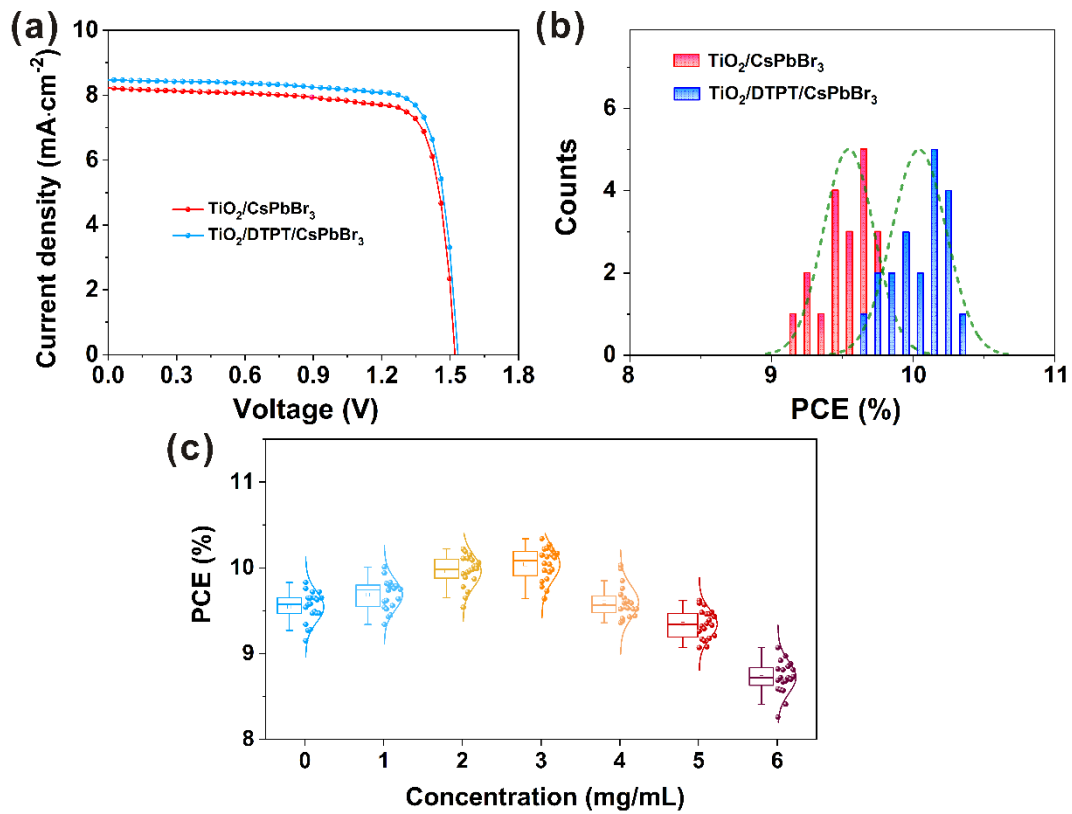

**Fig. S6** (a) The  $J$ - $V$  curves of PSCs and (b) histograms of PCEs measured (40 devices) based on TiO<sub>2</sub> and TiO<sub>2</sub>/DTPT films. (c) The PCE statistics of devices for each DTPT concentrations deposited on TiO<sub>2</sub> films.

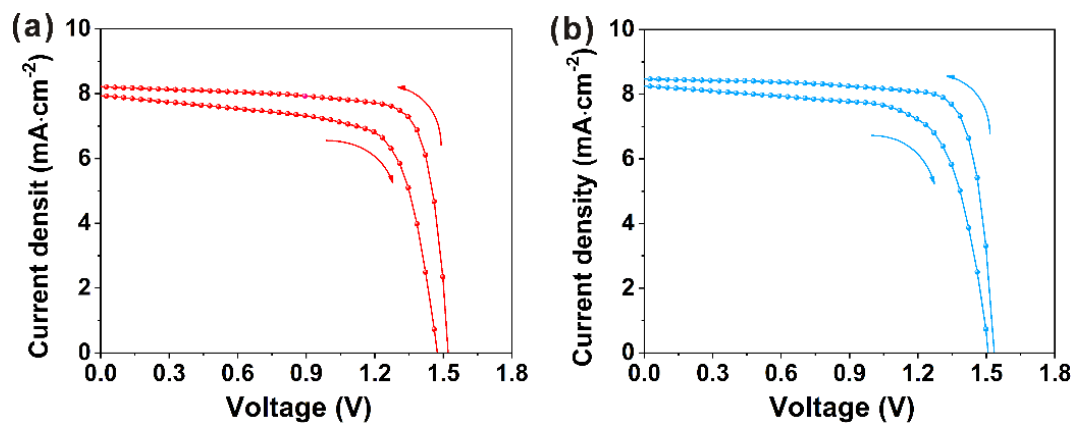

**Fig. S7** Reverse scan and forward scan  $J$ - $V$  curves of PSCs based on (a)  $\text{TiO}_2$  and (b)  $\text{TiO}_2/\text{DTPT}$  films.



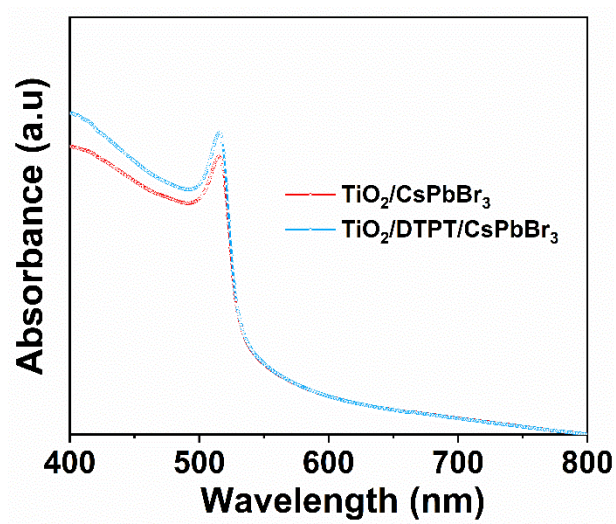

**Fig. S8** Absorption spectra of CsPbBr<sub>3</sub> films deposited on TiO<sub>2</sub> and TiO<sub>2</sub>/DTPT films.

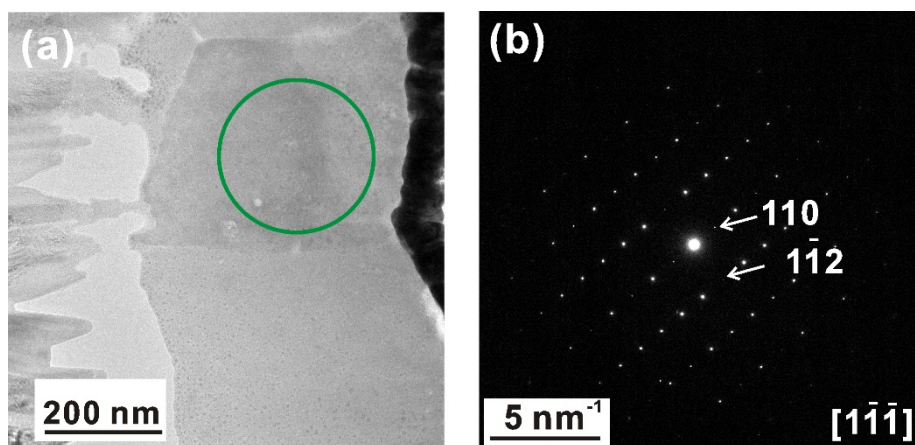

**Fig. S9** (a) Cross-section TEM image of CsPbBr<sub>3</sub> film with DTPT treated and (b) its SAED in green circle in the TEM image.

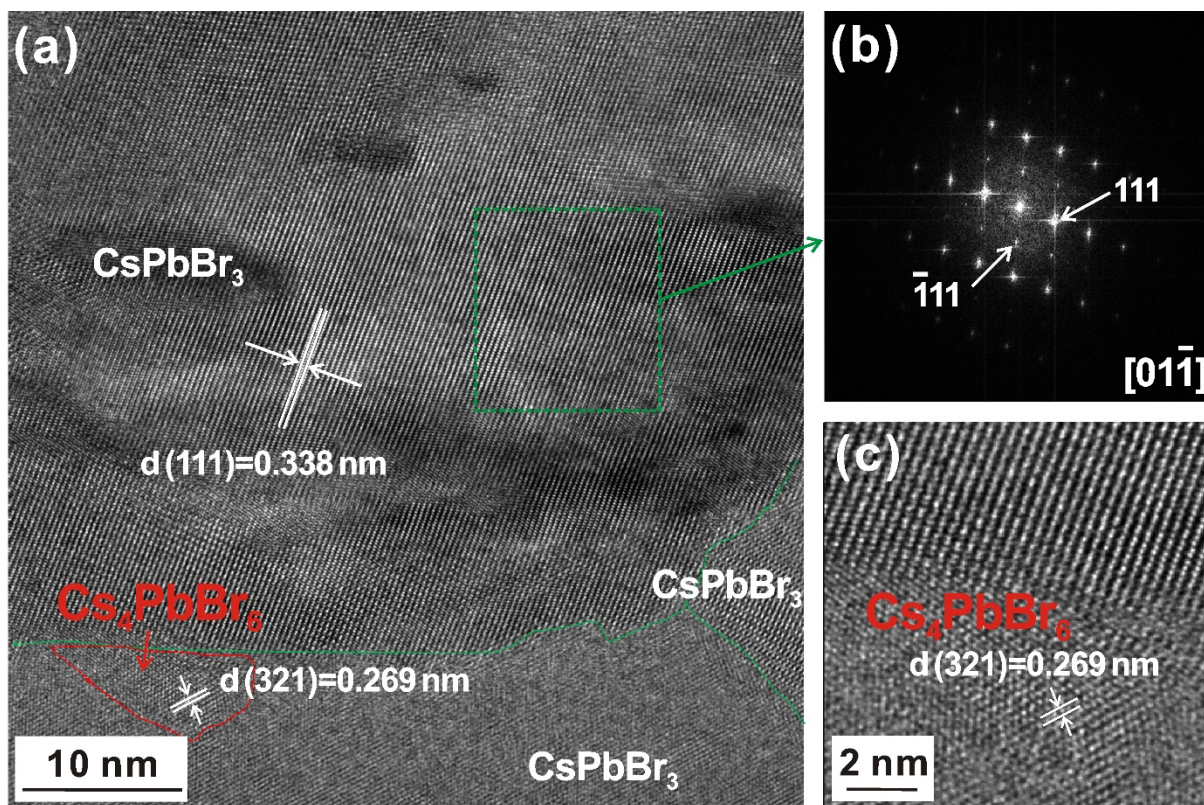

**Fig. S10** (a) Planar-view high-resolution transmission electron microscopy (HRTEM) image, (b) FFT and (c) Partial enlargement image of  $\text{TiO}_2/\text{DTPT}/\text{CsPbBr}_3$  film without top-surface DTPT treated.

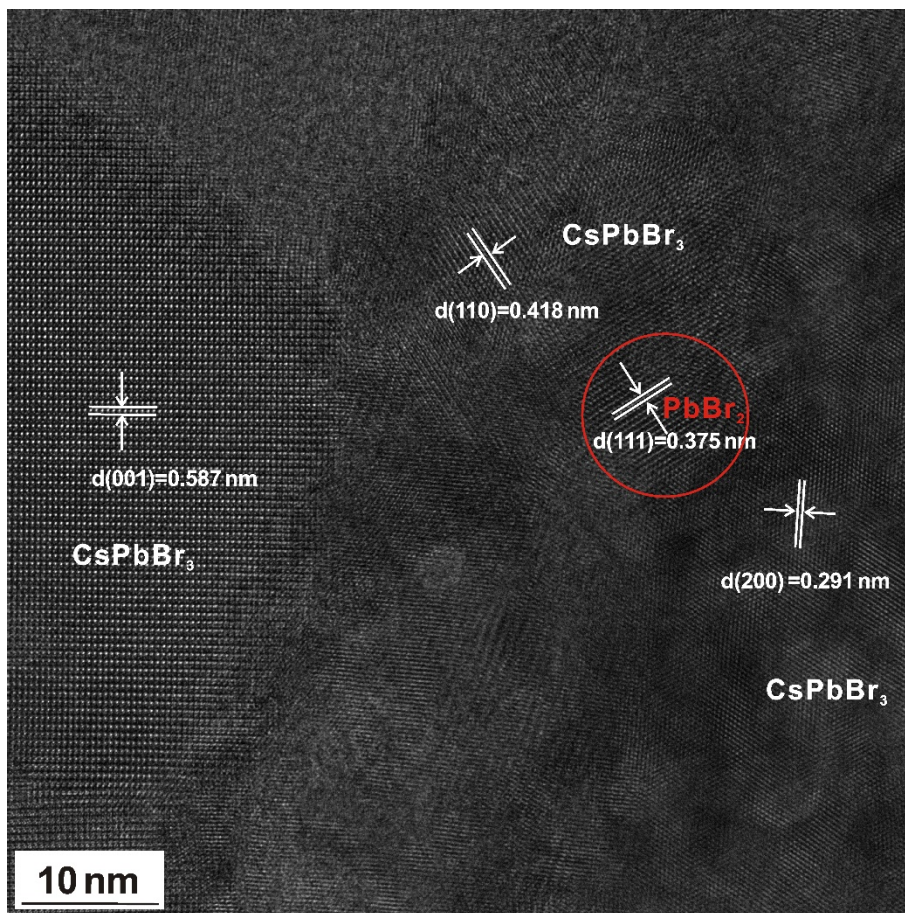

**Fig. S11** Planar-view HRTEM image of  $\text{TiO}_2/\text{DTPT}/\text{CsPbBr}_3$  film without top-surface DTPT treated.

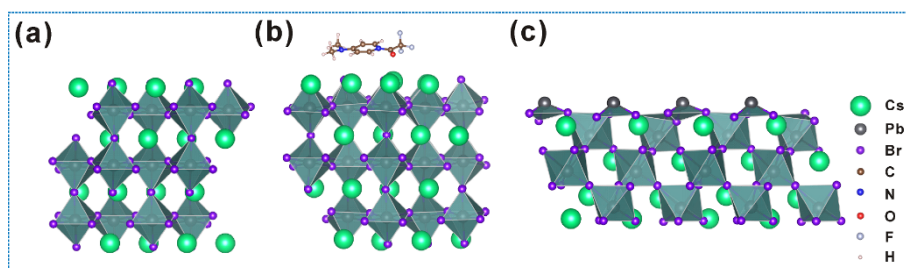

**Fig. S12** The structures without and with DTPT on the surface. The (001) phase of CsPbBr<sub>3</sub> (a) without and (b) with DTPT on the surface; (c) The (110) phase of CsPbBr<sub>3</sub> without DTPT on the surface.

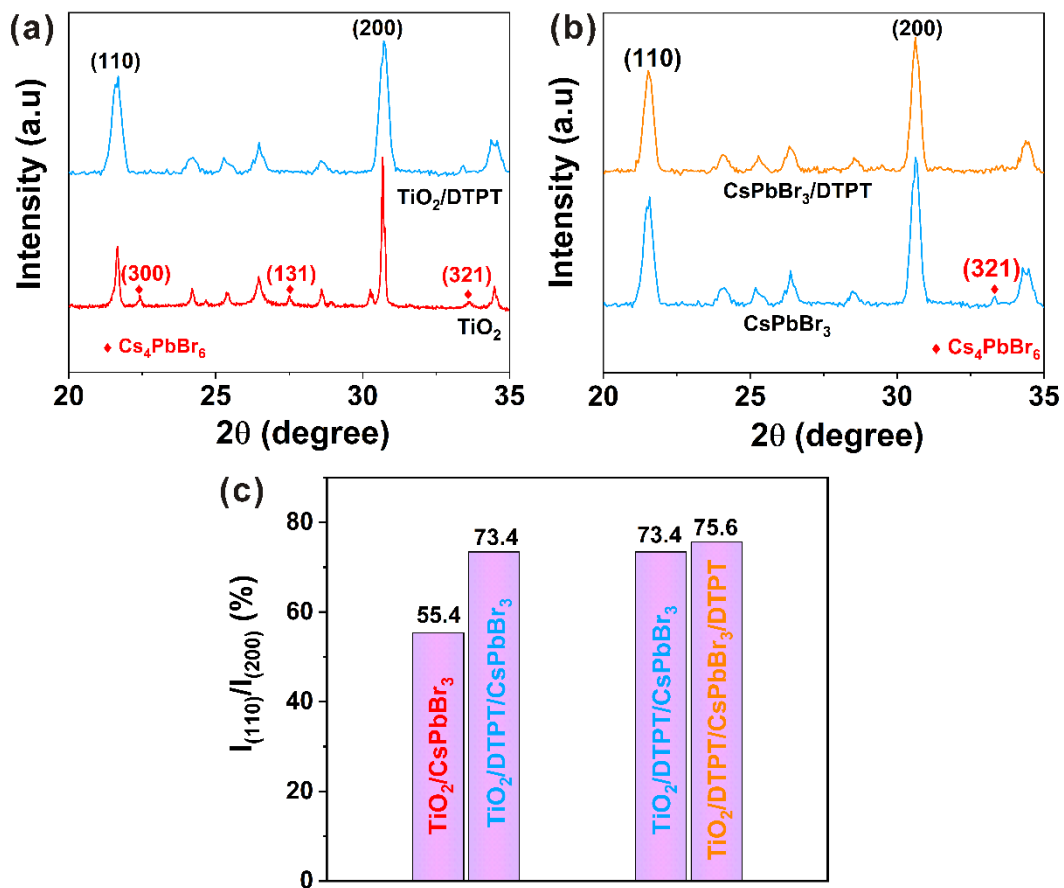

**Fig. S13** The enlarged XRD spectra of  $\text{CsPbBr}_3$  films deposited on (a)  $\text{TiO}_2$  and  $\text{TiO}_2/\text{DTPT}$  films and (b)  $\text{CsPbBr}_3$  and  $\text{CsPbBr}_3/\text{DTPT}$  substrates; (c) The peak intensity ratio of (110) and (200) in  $\text{TiO}_2/\text{CsPbBr}_3$ ,  $\text{TiO}_2/\text{DTPT}/\text{CsPbBr}_3$  and  $\text{TiO}_2/\text{DTPT}/\text{CsPbBr}_3/\text{DTPT}$  films.

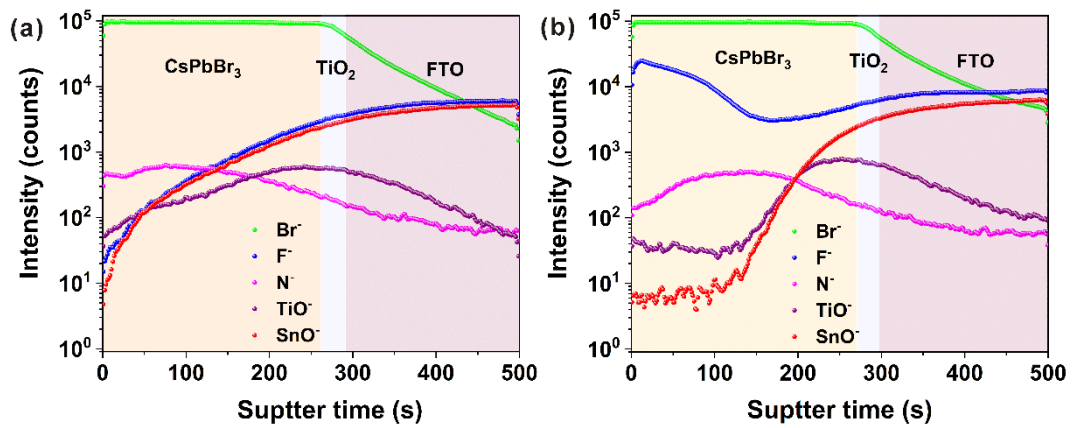

**Fig. S14** ToF-SIMS depth profiles of the (a) CsPbBr<sub>3</sub> and (b) CsPbBr<sub>3</sub>/DTPT films.

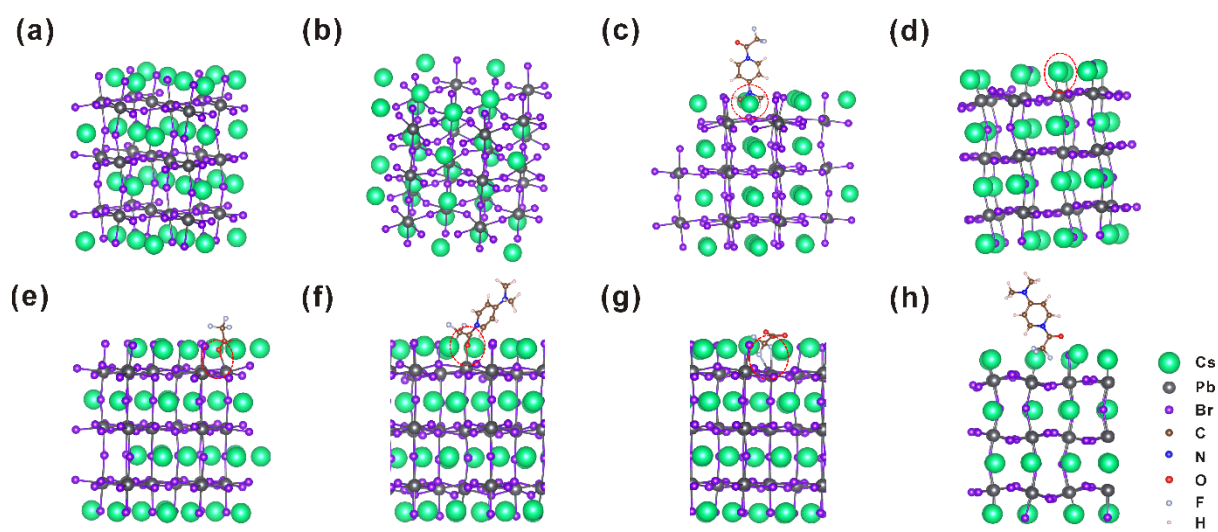

**Fig. S15** The structures of the CsPbBr<sub>3</sub> with vacancies and passivated. (a) The pristine; (b) with  $V_{\text{Cs}}$ ; (c)  $V_{\text{Cs}}$  passivated by the DTPT; (d) with  $V_{\text{Br}}$ ; (e)  $V_{\text{Br}}$  passivated by the carboxylic acid group in  $\text{CF}_3\text{COO}^-$ ; (f)  $V_{\text{Br}}$  passivated by the C=O in DTPT; (g)  $V_{\text{Br}}$  passivated by the  $\text{CF}_3^-$  group in  $\text{CF}_3\text{COO}^-$ ; (h)  $V_{\text{Br}}$  passivated by  $\text{CF}_3^-$  group in DTPT.



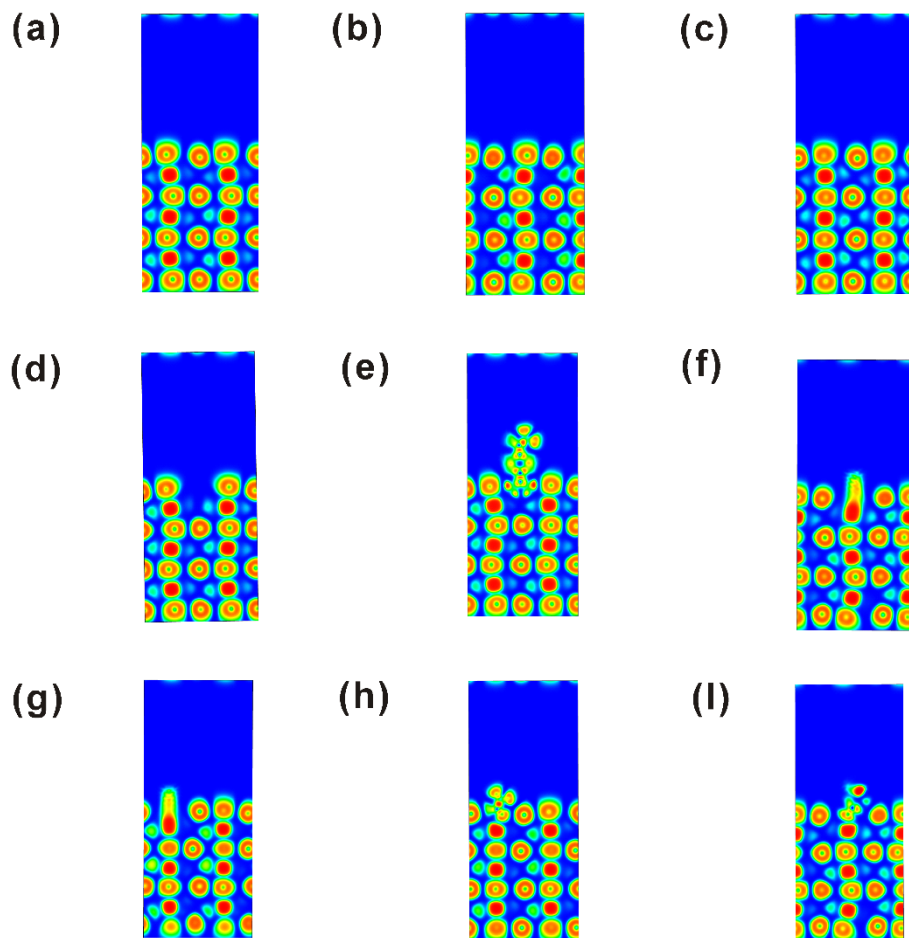

**Fig. S16** Electron localization function (ELF) results of the CsPbBr<sub>3</sub> with vacancies and passivated. (a) 2D section (0 0.33 0) of the pristine CsPbBr<sub>3</sub>; (b) 2D section (0 0.5 0) of the pristine CsPbBr<sub>3</sub>; (c) 2D section (0.5 0 0) of the pristine CsPbBr<sub>3</sub>; (d) 2D section (0 0.5 0) of the CsPbBr<sub>3</sub> with V<sub>Cs</sub>; (e) 2D section (0 0.5 0) of the DTPT passivated CsPbBr<sub>3</sub> with V<sub>Cs</sub>; (f) 2D section (0 0.33 0) of the CsPbBr<sub>3</sub> with V<sub>Br</sub>; (g) 2D section (0 0.5 0) of the CsPbBr<sub>3</sub> with V<sub>Br</sub>; (h) 2D section (0 0.33 0) of the CF<sub>3</sub>COO<sup>-</sup> passivated CsPbBr<sub>3</sub> with V<sub>Br</sub>; (i) 2D section (0 0.5 0) of the DTPT passivated CsPbBr<sub>3</sub> with V<sub>Br</sub>.

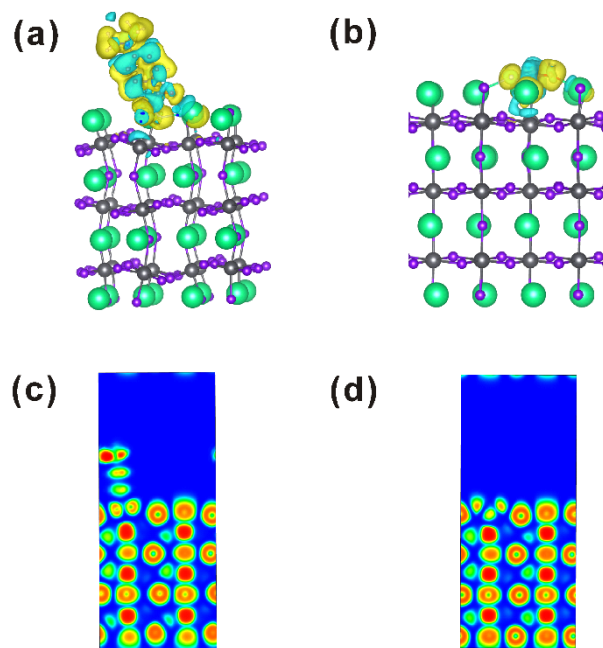

**Fig. S17** The DFT result of the CsPbBr<sub>3</sub> with  $V_{Br}$  passivated by the CF<sub>3</sub><sup>-</sup> group of DTPT. Differential charge density for (a)  $V_{Br}$  passivated by the CF<sub>3</sub><sup>-</sup> group in DTPT and (b)  $V_{Br}$  passivated by the CF<sub>3</sub><sup>-</sup> group in CF<sub>3</sub>COO<sup>-</sup>; ELF results for (c)  $V_{Br}$  passivated by the CF<sub>3</sub><sup>-</sup> group in DTPT and (d)  $V_{Br}$  passivated by the CF<sub>3</sub><sup>-</sup> group in CF<sub>3</sub>COO<sup>-</sup>.

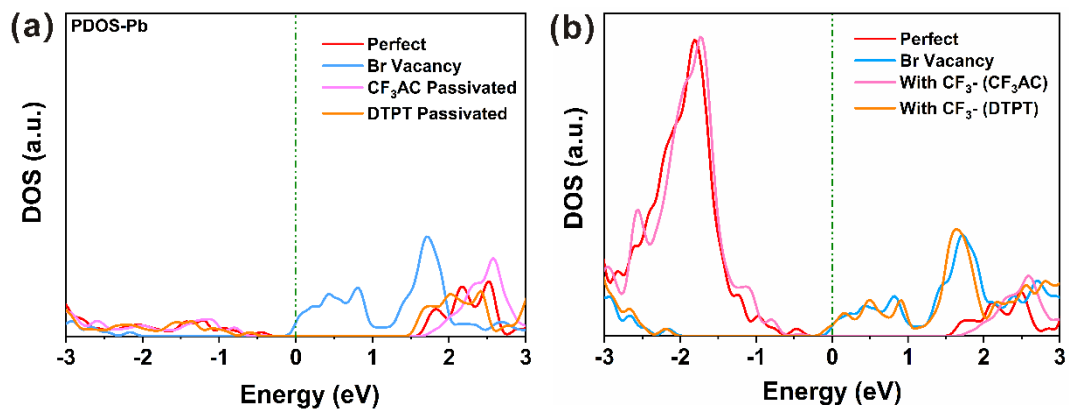

**Fig. S18** Electronic partial density of state (PDOS) curves for Pb of the CsPbBr<sub>3</sub> with  $V_{\text{Br}}$  passivated by CF<sub>3</sub>AC and DTPT;

(b) Density of state of CsPbBr<sub>3</sub> with  $V_{\text{Br}}$  passivated by the CF<sub>3</sub>- group of CF<sub>3</sub>AC and DTPT.

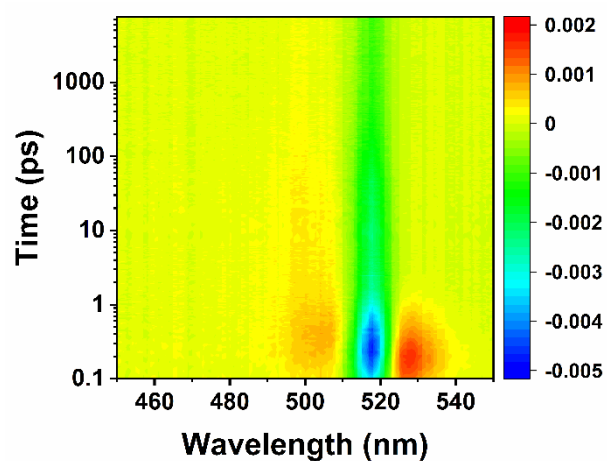

**Fig. S19** Pseudo-colour femtosecond transient absorption (fs-T(A)) spectrum plots of CsPbBr<sub>3</sub> film upon a pulsed fs-laser excitation at 400 nm.

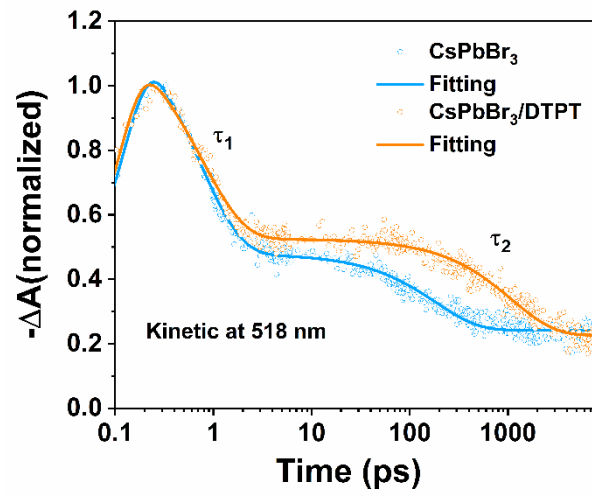

**Fig. S20** Normalized bleaching kinetics at 518 nm of the  $\text{CsPbBr}_3$  and  $\text{CsPbBr}_3/\text{DTPT}$  films.

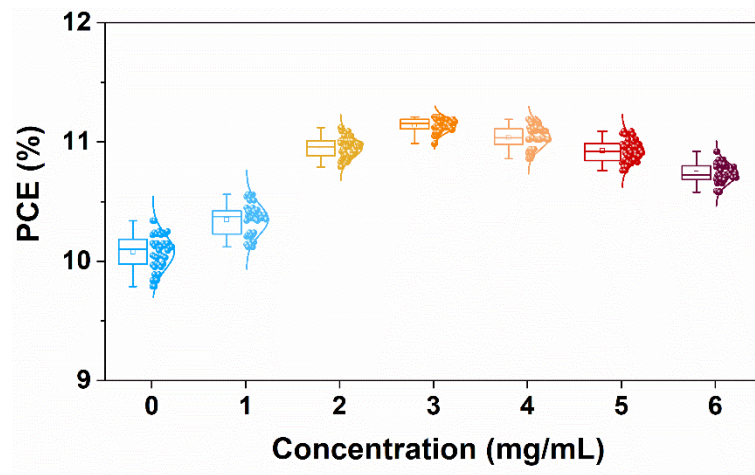

**Fig. S21** The PCE statistics of 40 devices for each DTPT concentrations.

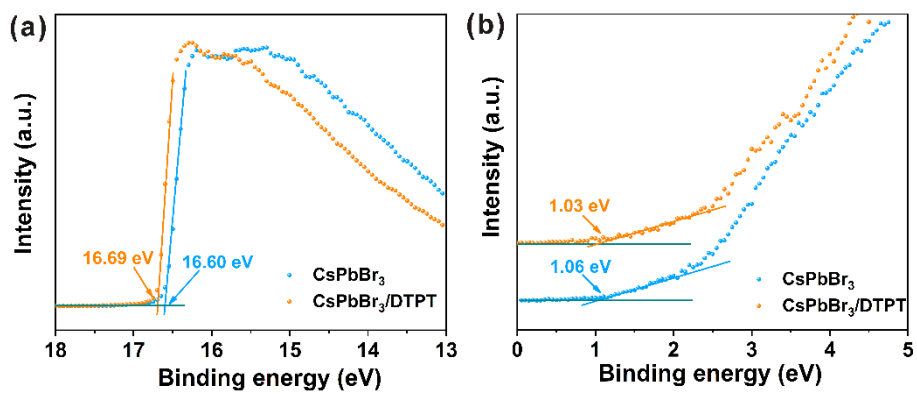

**Fig. S22** (a) The cut-off energy ( $E_{\text{cut-off}}$ ), (b) valence band maximum (VBM) edges of CsPbBr<sub>3</sub> and CsPbBr<sub>3</sub>/DTPPT films.

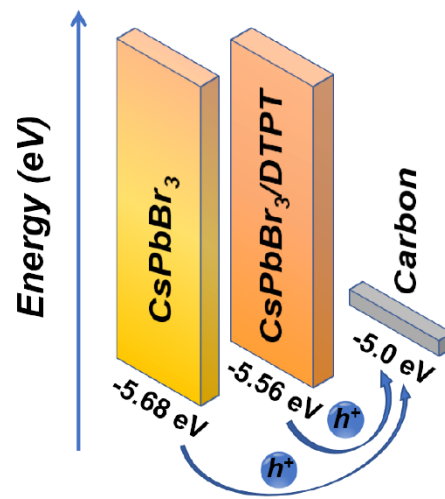

**Fig. S23** Energy band of each isolated layer in the device.



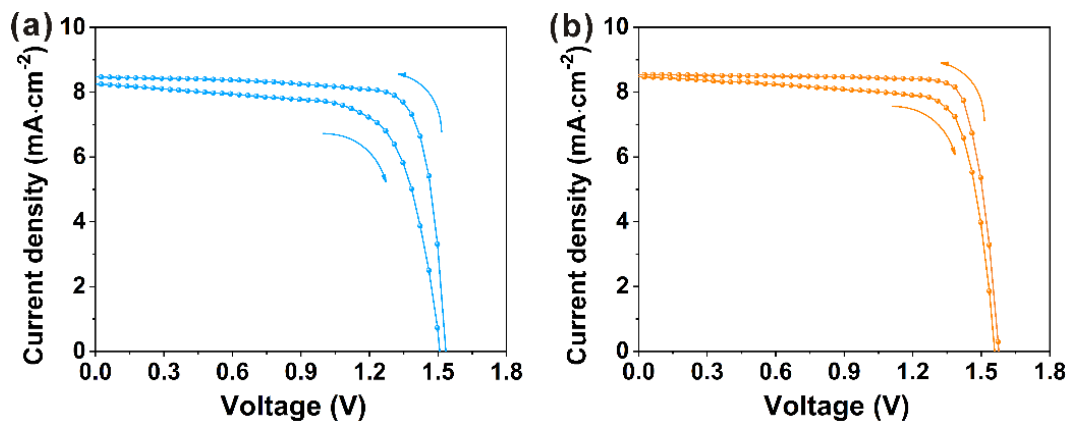

**Fig. S24** The *J-V* curves of PSCs based on (a) CsPbBr<sub>3</sub> and (b) CsPbBr<sub>3</sub>/DTPT under different scanning directions.

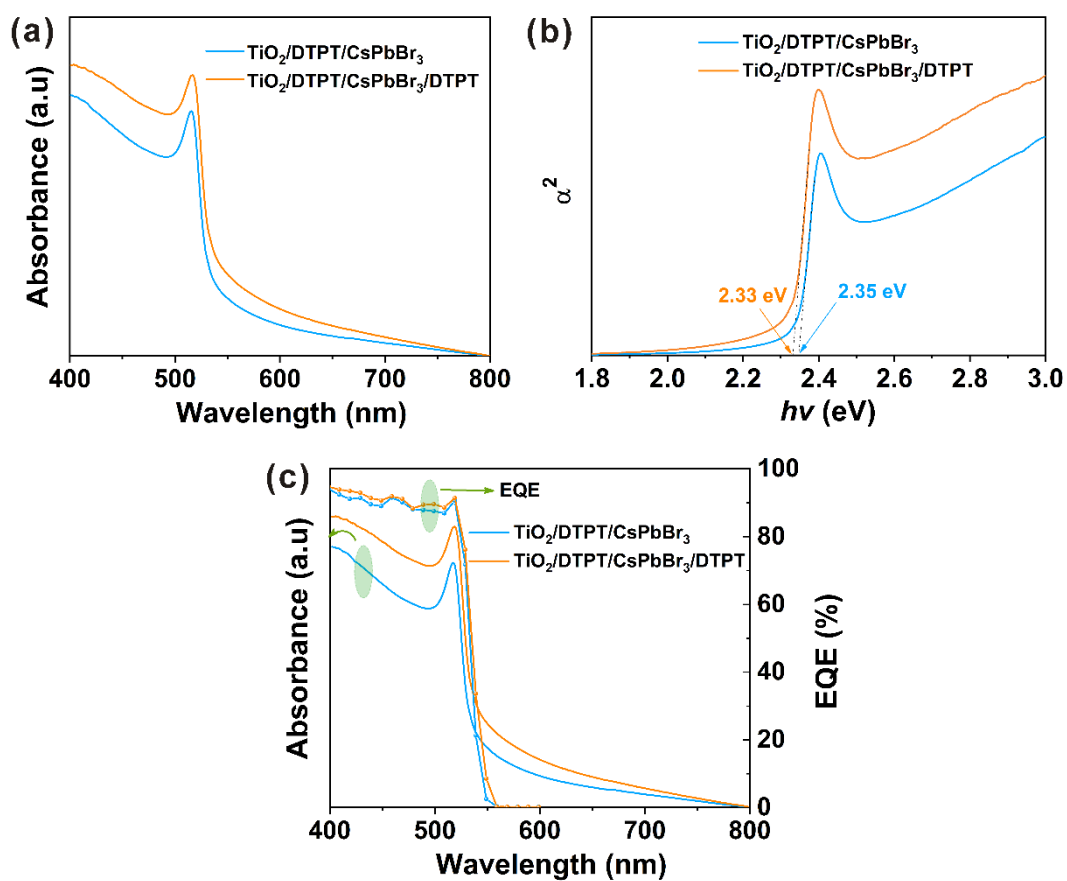

**Fig. S25** (a) Absorption spectra and (b) Tauc plots of  $\text{CsPbBr}_3$  and  $\text{CsPbBr}_3/\text{DTPT}$  films deposited on  $\text{TiO}_2/\text{DTPT}$  films. (c) Absorption spectra and EQE spectra of  $\text{CsPbBr}_3$  and  $\text{CsPbBr}_3/\text{DTPT}$  films deposited on  $\text{TiO}_2/\text{DTPT}$  films.

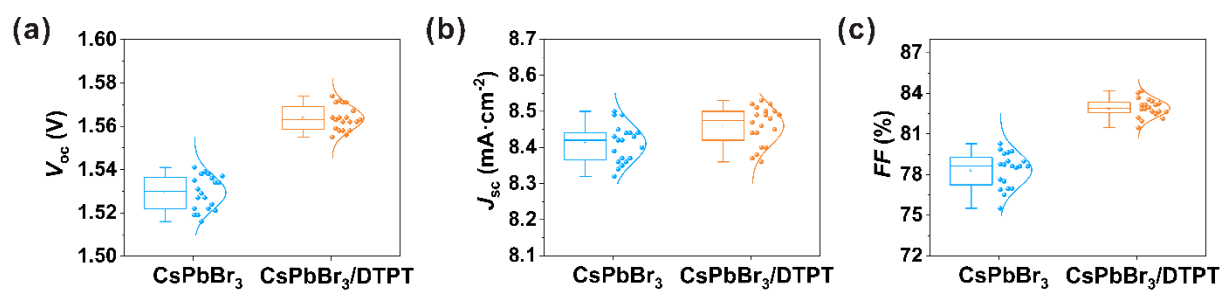

Fig. S26 Statistical (a)  $V_{oc}$ , (b)  $J_{sc}$ , and (c)  $FF$  of the devices with and without DTPT.

## Supplementary Tables

**Table S1.** Photovoltaic parameters of PSCs based on TiO<sub>2</sub> and TiO<sub>2</sub>/DTPT films.

| Samples                | Scan-direction | PCE (%) | $V_{oc}$ (V) | $J_{sc}$ (mA·cm <sup>-2</sup> ) | $FF$ (%) |
|------------------------|----------------|---------|--------------|---------------------------------|----------|
| TiO <sub>2</sub>       | backward       | 9.83    | 1.521        | 8.22                            | 78.66    |
|                        | forward        | 8.19    | 1.475        | 7.94                            | 69.93    |
| TiO <sub>2</sub> /DTPT | backward       | 10.34   | 1.535        | 8.43                            | 79.87    |
|                        | forward        | 8.71    | 1.508        | 8.23                            | 70.18    |

**Table S2.** Photovoltaic parameters of PSCs based on CsPbBr<sub>3</sub> and CsPbBr<sub>3</sub>/DTPT.

| Samples                   | Scan-direction | PCE (%) | $V_{oc}$ (V) | $J_{sc}$ (mA·cm <sup>-2</sup> ) | FF (%) |
|---------------------------|----------------|---------|--------------|---------------------------------|--------|
| CsPbBr <sub>3</sub>       | backward       | 10.34   | 1.535        | 8.43                            | 79.87  |
|                           | forward        | 8.71    | 1.508        | 8.23                            | 70.18  |
| CsPbBr <sub>3</sub> /DTPT | backward       | 11.21   | 1.574        | 8.52                            | 83.67  |
|                           | forward        | 10.12   | 1.559        | 8.47                            | 76.64  |

**Table S3.** Comparison of photovoltaic parameters for state-of-the-art CsPbBr<sub>3</sub> PSCs.

| PSCs                                                                                                                                                                                    | PCE (%)      | $J_{sc}$ (mA cm <sup>-2</sup> ) | $V_{oc}$ (V) | FF (%)       | Ref.             |
|-----------------------------------------------------------------------------------------------------------------------------------------------------------------------------------------|--------------|---------------------------------|--------------|--------------|------------------|
| <b>FTO/TiO<sub>2</sub>/DTPT/CsPbBr<sub>3</sub>/DTPT/Carbon</b>                                                                                                                          | <b>11.21</b> | <b>8.52</b>                     | <b>1.574</b> | <b>83.67</b> | <b>This work</b> |
| FTO/SnO <sub>2</sub> -TiO <sub>x</sub> Cl <sub>4-2x</sub> /CsPbBr <sub>3</sub> + Ti <sub>3</sub> C <sub>2</sub> Cl <sub>x</sub> /Ti <sub>3</sub> C <sub>2</sub> Cl <sub>x</sub> /Carbon | 11.08        | 7.87                            | 1.702        | 82.7         | 1                |
| FTO/c-TiO <sub>2</sub> /m-TiO <sub>2</sub> /CsPbBr <sub>3</sub> / CuInS <sub>2</sub> /ZnS QDs/LPP-Carbon                                                                                | 10.85        | 7.73                            | 1.626        | 86.3         | 2                |
| FTO/c-TiO <sub>2</sub> /m-TiO <sub>2</sub> /GQDs/CsPbBr <sub>3</sub> /Carbon                                                                                                            | 9.72         | 8.12                            | 1.458        | 82.1         | 3                |
| FTO/c-TiO <sub>2</sub> /m-TiO <sub>2</sub> /Sm <sup>3+</sup> -CsPbBr <sub>3</sub> / Cu(Cr,Ba)O <sub>2</sub> /Carbon                                                                     | 10.79        | 7.81                            | 1.615        | 85.5         | 4                |
| FTO/c-TiO <sub>2</sub> /m-TiO <sub>2</sub> /Sm <sup>3+</sup> -CsPbBr <sub>3</sub> /Carbon                                                                                               | 10.14        | 7.48                            | 1.594        | 85.1         | 5                |
| FTO/c-TiO <sub>2</sub> /m-TiO <sub>2</sub> /GQDs/CsPbBr <sub>3</sub> /MnS/Carbon                                                                                                        | 10.45        | 8.28                            | 1.52         | 83           | 6                |
| FTO/c-TiO <sub>2</sub> /m-TiO <sub>2</sub> /CsPbBr <sub>3</sub> /P1Z1/Carbon                                                                                                            | 10.03        | 7.652                           | 1.578        | 83.06        | 7                |
| FTO/c-TiO <sub>2</sub> /PTI-CsPbBr <sub>3</sub> /spiro-OMeTAD/Ag                                                                                                                        | 10.91        | 9.78                            | 1.498        | 74.47        | 8                |
| FTO/c-TiO <sub>2</sub> /CsPbBr <sub>3</sub> /CsPbBr <sub>3</sub> -CsPb <sub>2</sub> Br <sub>5</sub> /CsPbBr <sub>3</sub> -Cs <sub>4</sub> PbBr <sub>6</sub> /Carbon                     | 10.17        | 9.26                            | 1.461        | 75.39        | 9                |
| FTO/c-TiO <sub>2</sub> /CsPbBr <sub>3</sub> /Carbon                                                                                                                                     | 9.35         | 7.37                            | 1.545        | 82.2         | 10               |
| FTO/c-TiO <sub>2</sub> /m-TiO <sub>2</sub> /CsPb <sub>0.97</sub> Tb <sub>0.03</sub> Br <sub>3</sub> /SnS:ZnS/NiO <sub>x</sub> /carbon                                                   | 10.26        | 8.21                            | 1.57         | 79.6         | 11               |
| FTO/SnO <sub>2</sub> /CsPbBr <sub>3</sub> /N-CQDs/Carbon                                                                                                                                | 10.71        | 7.87                            | 1.622        | 80.1         | 12               |
| FTO/SnO <sub>2</sub> /CsPbBr <sub>3</sub> /CsSnBr <sub>3</sub> /Carbon                                                                                                                  | 10.60        | 7.80                            | 1.610        | 84.4         | 13               |
| FTO/SnO <sub>2</sub> -TiO <sub>x</sub> Cl <sub>4-2x</sub> /WS <sub>2</sub> /CsPbBr <sub>3</sub> /Carbon                                                                                 | 10.65        | 7.95                            | 1.70         | 79           | 14               |
| FTO/c-TiO <sub>2</sub> /CsPbBr <sub>3</sub> -CsPb <sub>2</sub> Br <sub>5</sub> /spiro-OMeTAD/Ag                                                                                         | 8.34         | 8.48                            | 1.296        | 75.9         | 15               |
| FTO/c-TiO <sub>2</sub> /m-TiO <sub>2</sub> /CsPbBr <sub>2.98</sub> Cl <sub>0.02</sub> /Carbon                                                                                           | 9.73         | 7.47                            | 1.571        | 82.93        | 16               |

**Table S4.** Comparison of photovoltaic parameters for large-area CsPbBr<sub>3</sub> PSCs.

| PSCs                                                                                                        | Active area       | Method             | PCE (%) | $J_{sc}$ (mA cm <sup>-2</sup> ) | $V_{oc}$ (V) | FF (%) | Ref.      |
|-------------------------------------------------------------------------------------------------------------|-------------------|--------------------|---------|---------------------------------|--------------|--------|-----------|
| FTO/TiO <sub>2</sub> /DTPT/CsPbBr <sub>3</sub> /DTPT/Carbon                                                 | 1 cm <sup>2</sup> | Vapour deposition  | 9.18    | 7.81                            | 1.509        | 77.85  | This work |
| FTO/c-TiO <sub>2</sub> /CsPbBr <sub>3</sub> /spiro-OMeTAD/Au                                                | 1 cm <sup>2</sup> | Vacuum evaporation | 5.37    | 5.11                            | 1.32         | 79.32  | 17        |
| FTO/c-TiO <sub>2</sub> /CsPbBr <sub>3</sub> /CuPc/Carbon                                                    | 1 cm <sup>2</sup> | Vacuum evaporation | 6.21    | 6.65                            | 1.375        | 67.9   | 18        |
| FTO/c-TiO <sub>2</sub> /SnO <sub>2</sub> /CsPbBr <sub>3</sub> /CuPc/carbon                                  | 1 cm <sup>2</sup> | Spin-coating       | 6.9     | 6.93                            | 1.396        | 71.3   | 19        |
| FTO/Ga-SnO <sub>2</sub> /CsPbBr <sub>3</sub> /Carbon                                                        | 1 cm <sup>2</sup> | Spin-coating       | 5.98    | 7.58                            | 1.311        | 60.2   | 20        |
| FTO/c-TiO <sub>2</sub> /m-TiO <sub>2</sub> /Cs <sub>0.91</sub> Rb <sub>0.09</sub> PbBr <sub>3</sub> /Carbon | 1 cm <sup>2</sup> | Spin-coating       | 7.07    | —                               | —            | —      | 21        |

## Supplementary References

- 1 Q. Zhou, J. Duan, J. Du, Q. Guo, Q. Zhang, X. Yang, Y. Duan and Q. Tang, *Adv. Sci.*, 2021, **8**, 2101418.
- 2 J. Duan, Y. Wang, X. Yang and Q. Tang, *Angew. Chem. Int. Ed.*, 2020, **59**, 4391-4395.
- 3 J. Duan, Y. Zhao, B. He and Q. Tang, *Angew. Chem. Int. Ed.*, 2018, **57**, 3787-3791.
- 4 J. Duan, Y. Zhao, Y. Wang, X. Yang, Q. Tang, *Angew. Chem. Int. Ed.*, 2019, **58**, 16147-16151.
- 5 J. Duan, Y. Zhao, X. Yang, Y. Wang, B. He and Q. Tang, *Adv. Energy Mater.*, 2018, **8**, 1802346.
- 6 X. Li, Y. Tan, H. Lai, S. Li, Y. Chen, S. Li, P. Xu and J. Yang, *ACS Appl. Mater. Interfaces*, 2019, **11**, 29746-29752.
- 7 Y. Liu, B. He, J. Duan, Y. Zhao, Y. Ding, M. Tang, H. Chen and Q. Tang, *J. Mater. Chem. A*, 2019, **7**, 12635-12644.
- 8 G. Tong, T. Chen, H. Li, L. Qiu, Z. Liu, Y. Dang, W. Song, L. K. Ono, Y. Jiang and Y. Qi, *Nano Energy*, 2019, **65**, 104015.
- 9 G. Tong, T. Chen, H. Li, W. Song, Y. Chang, J. Liu, L. Yu, J. Xu, Y. Qi and Y. Jiang, *Sol. RRL*, 2019, **3**, 1900030.
- 10 T. Xiang, Y. Zhang, H. Wu, J. Li, L. Yang, K. Wang, J. Xia, Z. Deng, J. Xiao, W. Li, Z. Ku, F. Huang, J. Zhong, Y. Peng and Y.-B. Cheng, *Sol. Energy Mater. Sol. Cells*, 2020, **206**, 110317.
- 11 H. Yuan, Y. Zhao, J. Duan, Y. Wang, X. Yang and Q. Tang, *J. Mater. Chem. A*, 2018, **6**, 24324-24329.
- 12 Y. Zhao, J. Duan, Y. Wang, X. Yang and Q. Tang, *Nano Energy*, 2020, **67**, 104286.
- 13 Y. Zhao, J. Duan, H. Yuan, Y. Wang, X. Yang, B. He and Q. Tang, *Sol. RRL*, 2019, **3**, 1800284.
- 14 Q. Zhou, J. Duan, X. Yang, Y. Duan and Q. Tang, *Angew. Chem. Int. Ed.*, 2020, **59**, 21997-22001.
- 15 H. Li, G. Tong, T. Chen, H. Zhu, G. Li, Y. Chang, L. Wang and Y. Jiang, *J. Mater. Chem. A*, 2018, **6**, 14255-14261.
- 16 X. Li, B. He, Z. Gong, J. Zhu, W. Zhang, H. Chen, Y. Duan and Q. Tang, *Sol. RRL*, 2020, **4**, 2000362.
- 17 J. Lei, F. Gao, H. Wang, J. Li, J. Jiang, X. Wu, R. Gao, Z. Yang and S. Liu, *Sol. Energy Mater. Sol. Cells*, 2018, **187**, 1-8.
- 18 X. Liu, X. Tan, Z. Liu, B. Sun, J. Li, S. Xi, T. Shi and G. Liao, *J. Power Sources*, 2019, **443**, 227269.
- 19 X. Liu, X. Tan, Z. Liu, H. Ye, B. Sun, T. Shi, Z. Tang and G. Liao, *Nano Energy*, 2019, **56**, 184-195.
- 20 Y. Zhao, Q. Deng, R. Guo, Z. Wu, Y. Li, Y. Duan, Y. Shen, W. Zhang and G. Shao, *ACS Appl. Mater. Interfaces*, 2020, **12**, 54904-54915.
- 21 Y. Li, J. Duan, H. Yuan, Y. Zhao, B. He and Q. Tang, *Sol. RRL*, 2018, **2**, 1800164.
